# Supplementary material for: Sulfonic acid functionalized zirconium-based metal–organic framework for the selective detection of copper(ii) ions
Source: Royal Society of Chemistry journal article supplement (doi:10.1039/d2nj01068b), 2022-01-01
Supplement: d2nj01068b1.pdf [file d2nj01068b1.pdf]

## Supporting Information For:

### **A sulfonic acid functionalized zirconium-based metal organic framework for the selective detection of copper(II) ion**

*Abhijeet Rana,<sup>a</sup> Soutick Nandi<sup>ab</sup> and Shyam Biswas<sup>a\*</sup>*

<sup>a</sup> Department of Chemistry, Indian Institute of Technology Guwahati, Guwahati, 781039 Assam, India.

<sup>b</sup> *Department of Applied Science, Ghani Khan Choudhury Institute of Engineering & Technology, Malda, 732141 West Bengal, India.*

\* Corresponding author. Tel: +91-3612583309, Fax: +91-3612582349.

E-mail address: sbiswas@iitg.ac.in

## Materials and General Methods:

All the reagents and solvents were purchased from commercial sources and used without purification, except the  $\text{H}_2\text{BPDC}-(\text{SO}_3\text{H})_2$  ligand which was synthesized by following a reported literature.<sup>1</sup> The Attenuated Total Reflectance Infrared (ATR-IR) spectra were recorded using PerkinElmer UATR Two at ambient condition in the region  $400\text{-}4000\text{ cm}^{-1}$ . The notations used for characterization of the bands are broad (br), strong (s), very strong (vs), medium (m), weak (w) and shoulder (sh). FE-SEM images were captured with a Zeiss (Zemini) scanning electron microscope. Thermogravimetric analysis (TGA) was carried out with an SDT Q600 V20.9 Build 20 thermogravimetric analyzer in the temperature range of  $25\text{-}700\text{ }^\circ\text{C}$  in an argon atmosphere at the rate of  $10\text{ }^\circ\text{C min}^{-1}$ . Rigaku Smartlab X-ray diffractometer (model TTRAX III) was employed for powder X-ray diffraction (PXRD) measurements at 50 kV, 100 mA using  $\text{Cu-K}\alpha$  ( $\lambda = 1.5406\text{ \AA}$ ) radiation.  $\text{N}_2$  sorption isotherms were recorded by using Quantachrome Autosorb iQ-MP volumetric gas adsorption equipment at  $-196\text{ }^\circ\text{C}$ . Before the sorption analysis, the degassing of the compound was carried out at  $100\text{ }^\circ\text{C}$  under high vacuum for 12 h. Fluorescence sensing studies were performed with a HORIBA JOBIN YVON Fluoromax-4 spectrofluorometer. A Bruker Avance III 600 NMR spectrometer was used for recording  $^1\text{H}$  NMR spectra at 600 MHz. Pawley refinement was carried out using Materials Studio software.

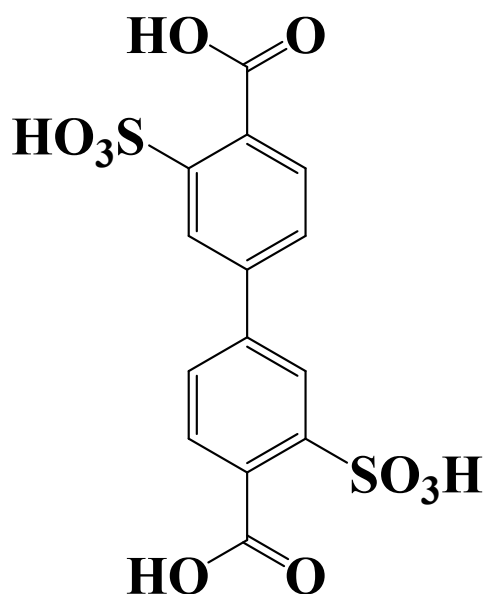

**Figure S1.** Structure of linker ( $\text{H}_2\text{BPDC}-(\text{SO}_3\text{H})_2$ ).

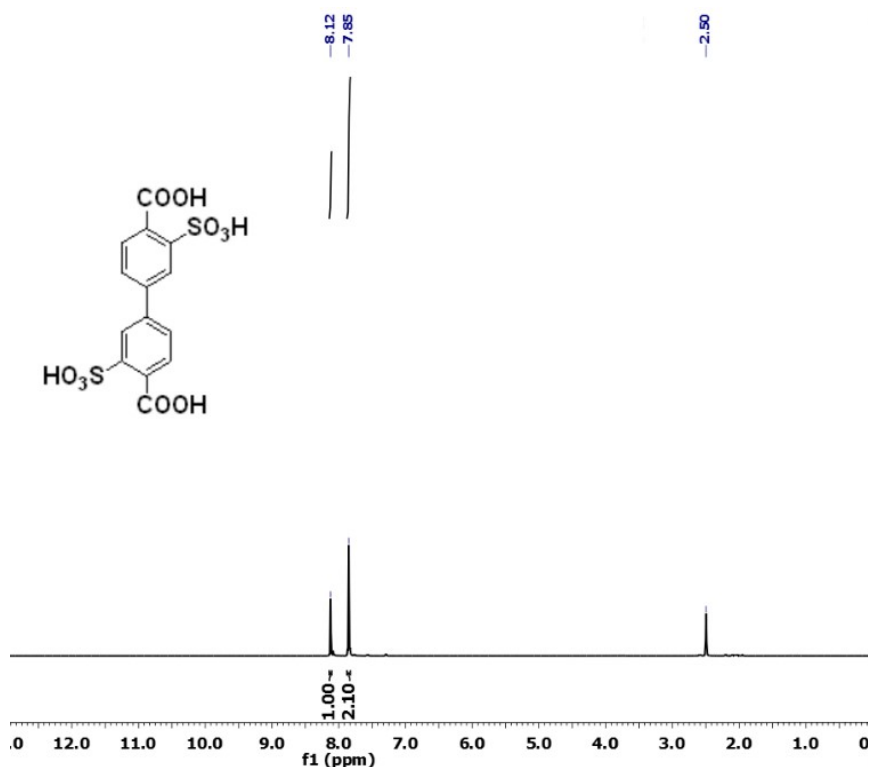

Figure S2. <sup>1</sup>H NMR of linker (H<sub>2</sub>BPDC-(SO<sub>3</sub>H)<sub>2</sub>).

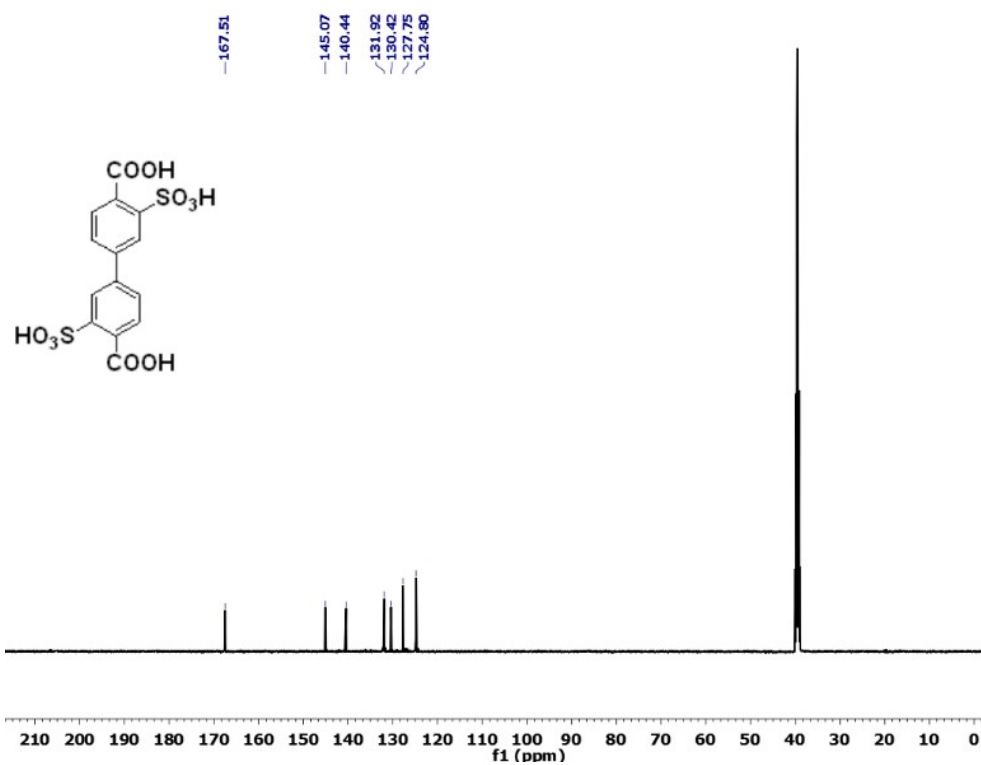

Figure S3. <sup>13</sup>C NMR of linker (H<sub>2</sub>BPDC-(SO<sub>3</sub>H)<sub>2</sub>).

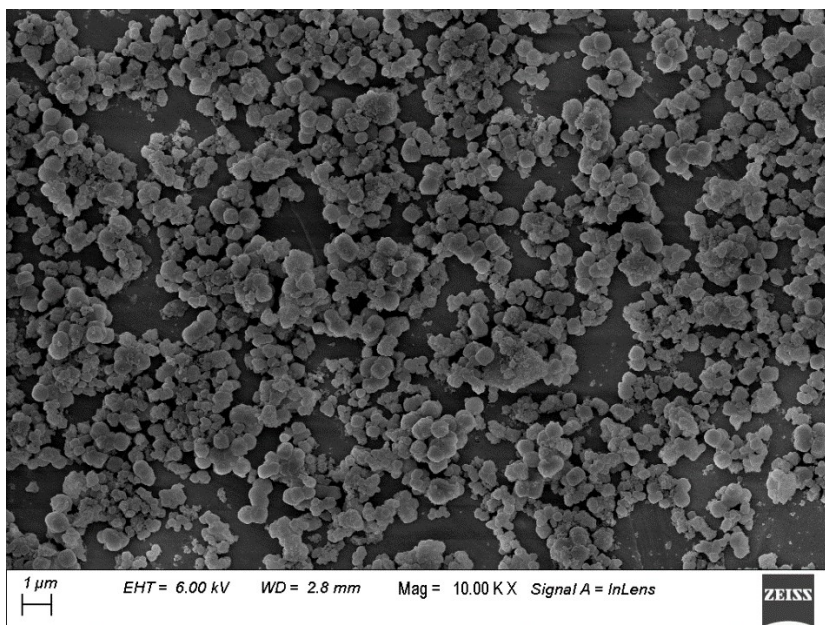

Figure S4. FESEM image of 1'.

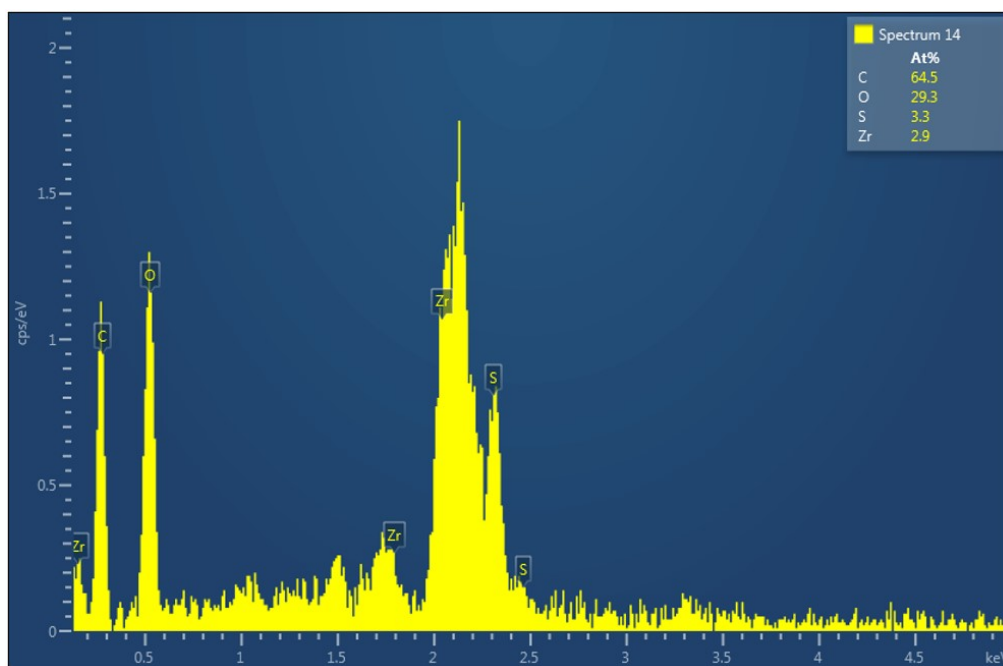

Figure S5. EDX spectrum of 1'.

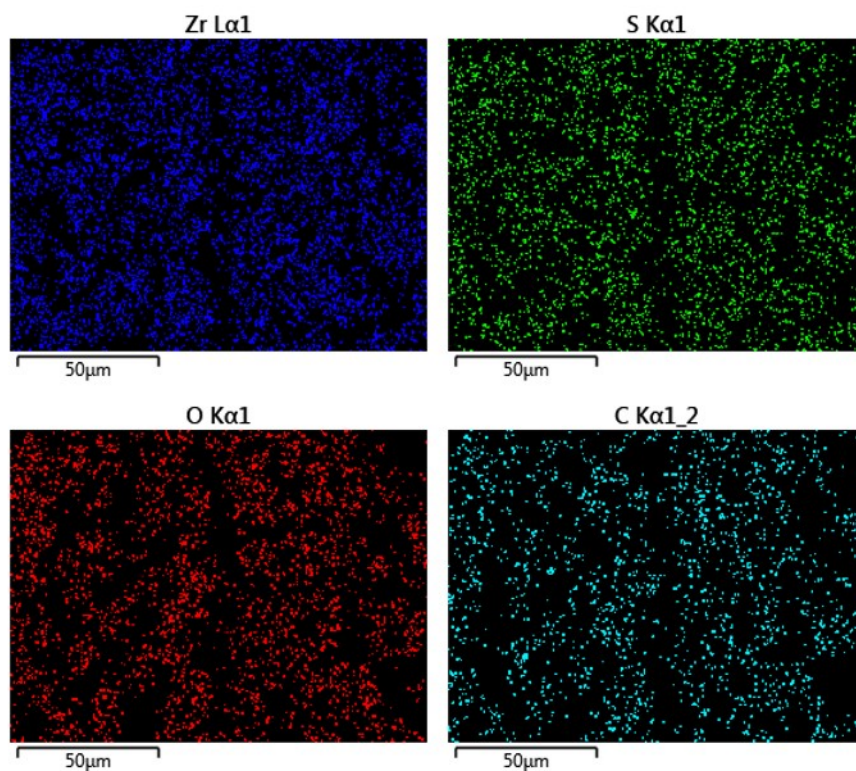

**Figure S6.** EDX elemental mapping of 1'.

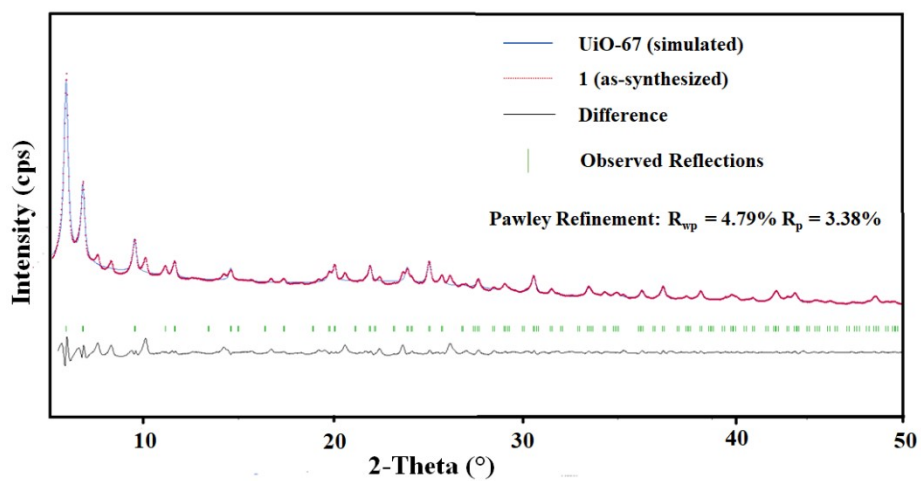

**Figure S7.** Pawley fit for the PXRD pattern of as-synthesized 1. Blue lines and red dots denote simulated and observed patterns, respectively. The peak positions and difference plot are displayed at middle ( $R_p = 3.38\%$ ,  $R_{wp} = 4.79\%$ ).

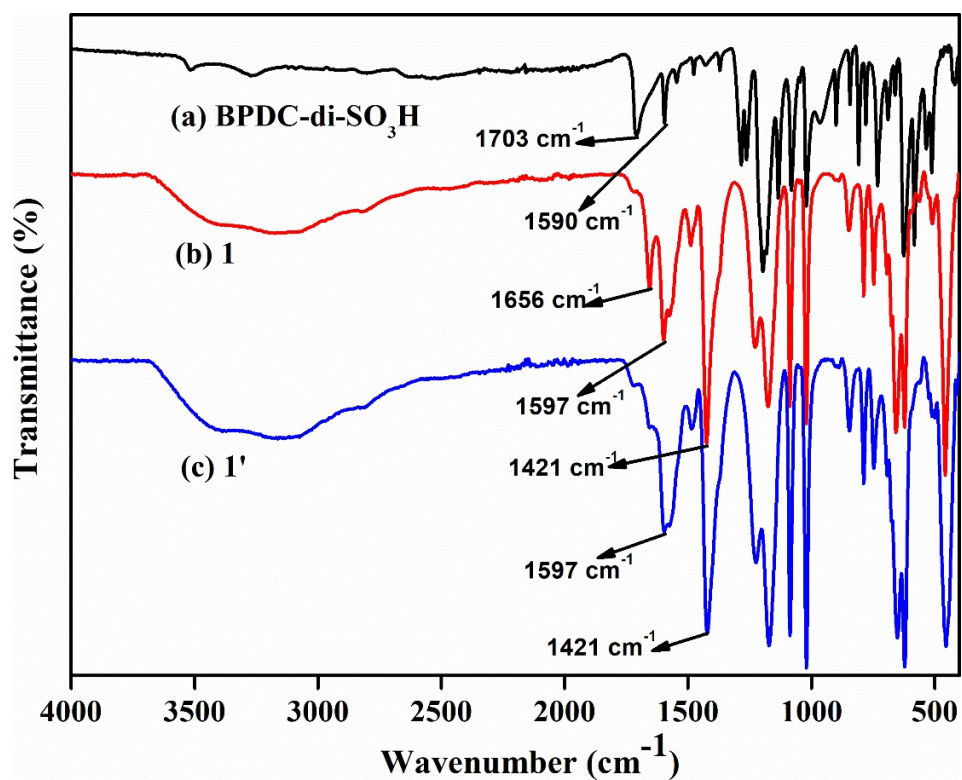

**Figure S8.** FT-IR spectra of (a) H<sub>2</sub>BPDC-(SO<sub>3</sub>H)<sub>2</sub> ligand (black), (b) as-synthesized **1** (red) and (c) activated **1'** (blue).

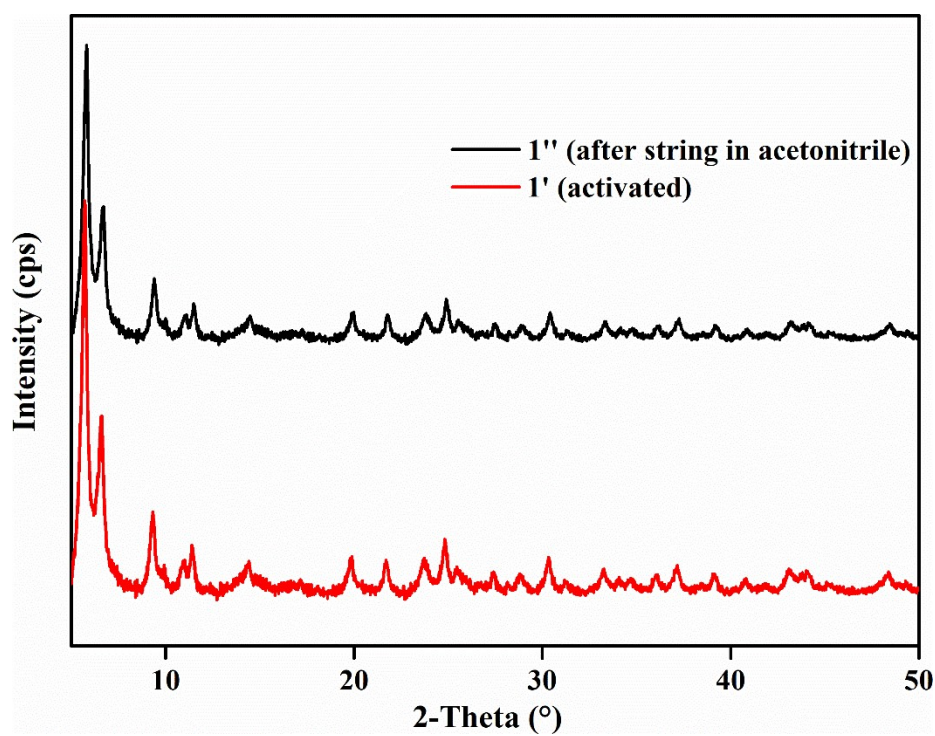

**Figure S9.** PXRD pattern of **1'** (red) and **1''** (black).

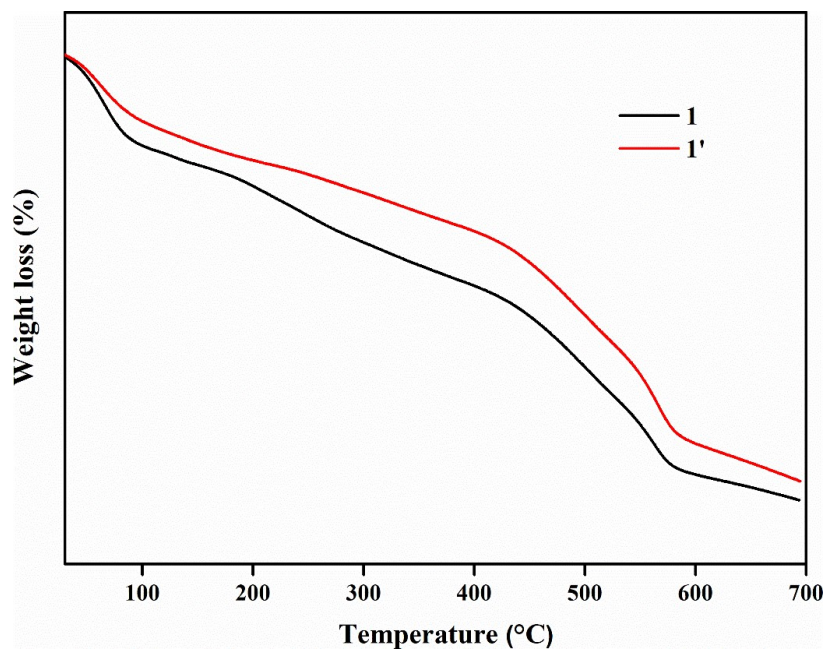

**Figure S10.** TGA curves of as-synthesized **1** (red) and activated **1'** (black) recorded in a nitrogen atmosphere in the temperature range of 30-700 °C at a heating rate of 10 °C min<sup>-1</sup>.

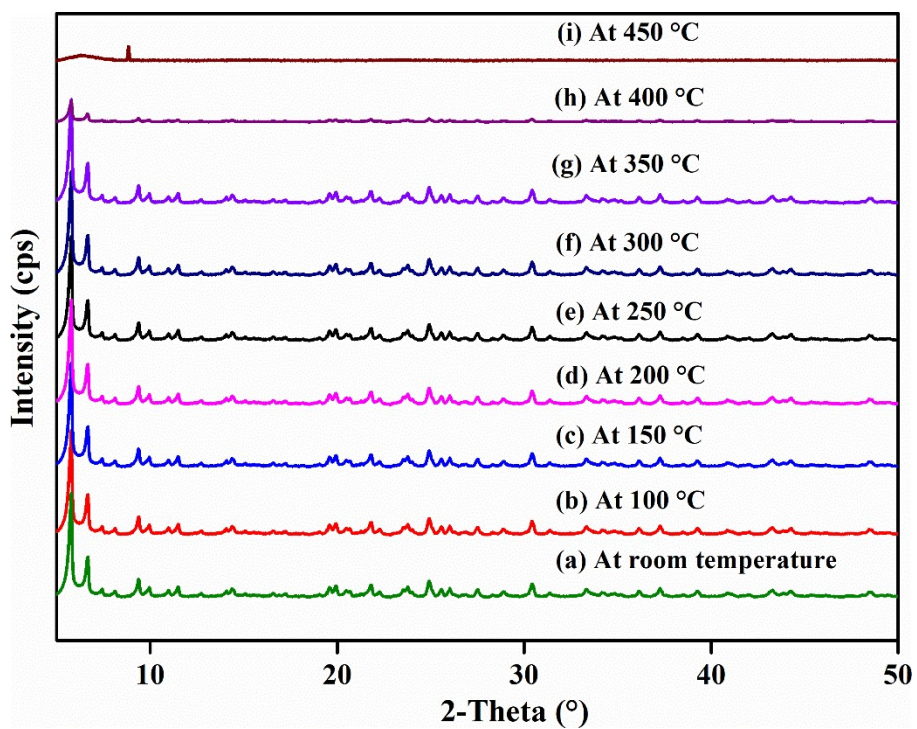

**Figure S11.** Temperature dependent PXRD patterns of **1'** up to 450 °C.

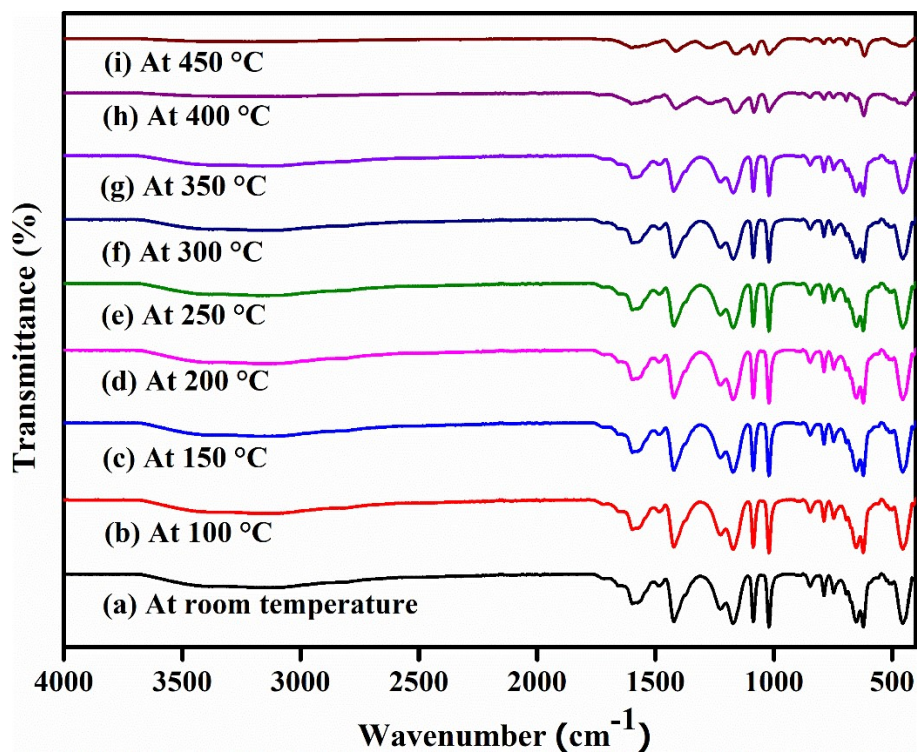

**Figure S12.** Temperature dependent FT-IR spectra of **1'** up to 450 °C.

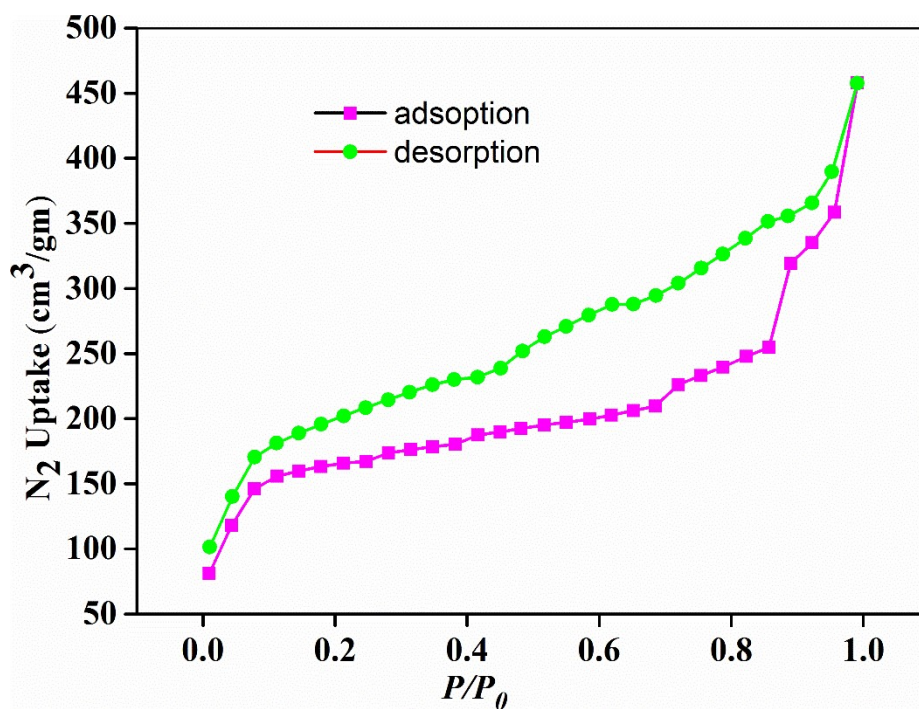

**Figure S13.** N<sub>2</sub> adsorption (green circles) and desorption (pink circles) isotherms of thermally activated **1'** recorded at -196 °C.



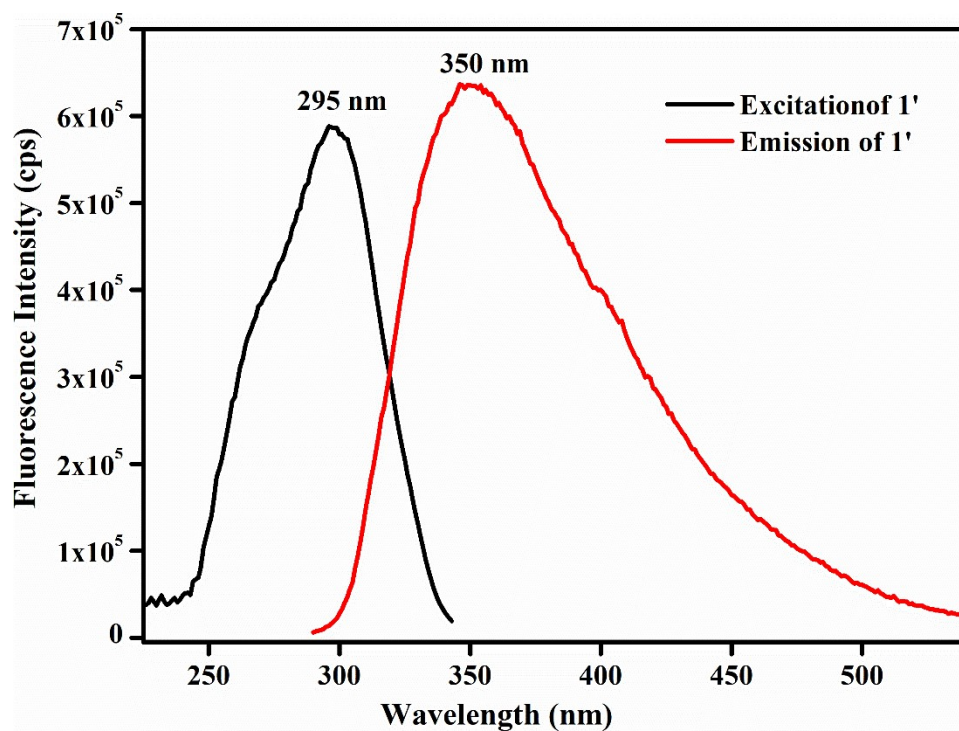

Figure S14. Fluorescence excitation (black) and emission (red) spectra of 1'.

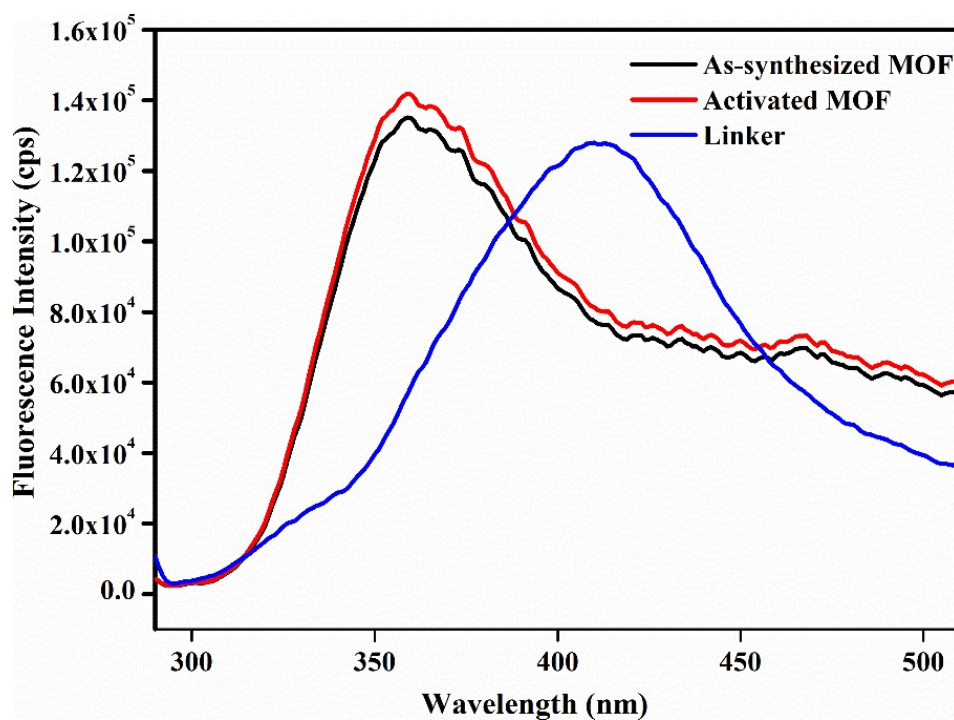

Figure S15. Solid state fluorescence spectra of 1 (black), 1' (red) and linker (blue).

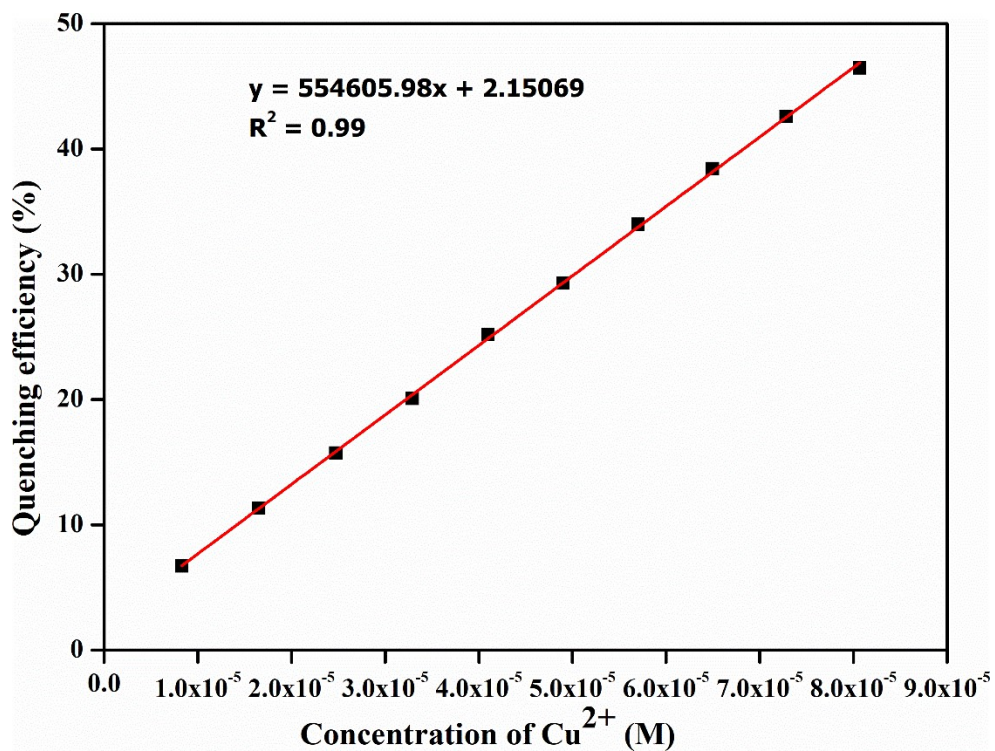

**Figure S16.** Stern-Volmer plot for the fluorescence emission quenching of 1' in presence of Cu<sup>2+</sup> solution.

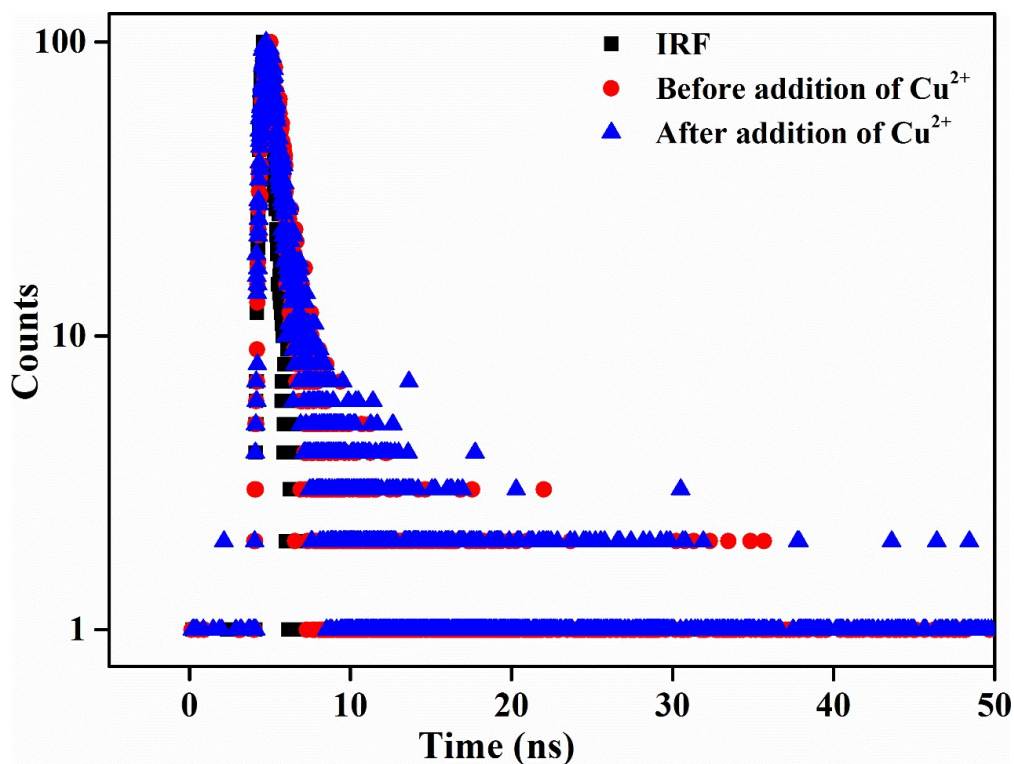

**Figure S17.** Lifetime decay profile of 1' before and after the addition of 2 mM Cu<sup>2+</sup> acetonitrile solution.

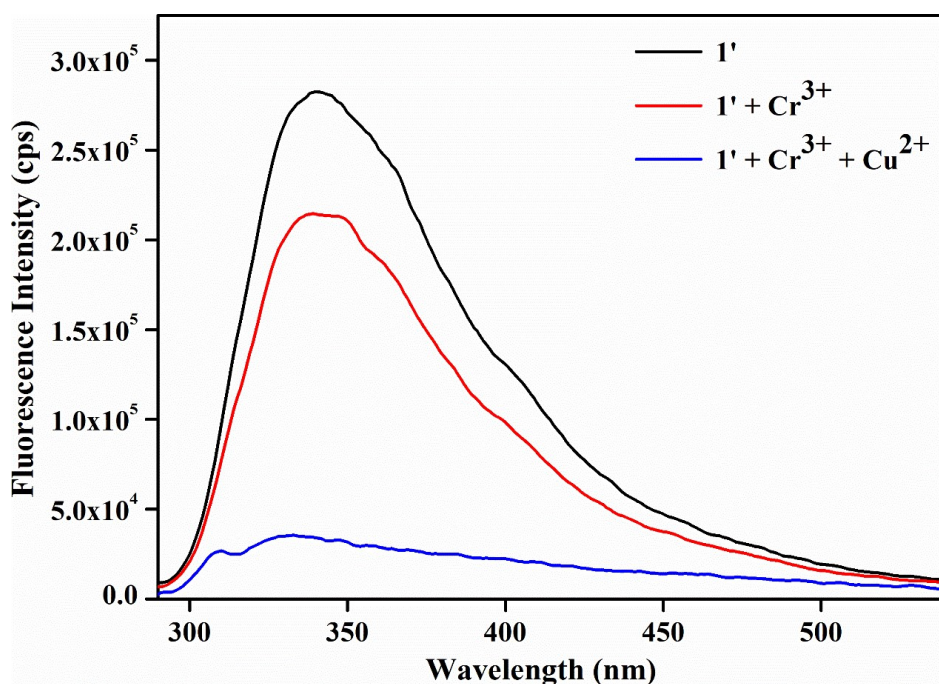

**Figure S18.** Fluorescence intensity of **1'** dispersed in acetonitrile after addition of 2 mM solution of  $\text{Cu}(\text{NO}_3)_2$  in acetonitrile (500  $\mu\text{L}$ ) in presence of 2 mM solution of  $\text{Cr}(\text{NO}_3)_3$  in acetonitrile (500  $\mu\text{L}$ ).

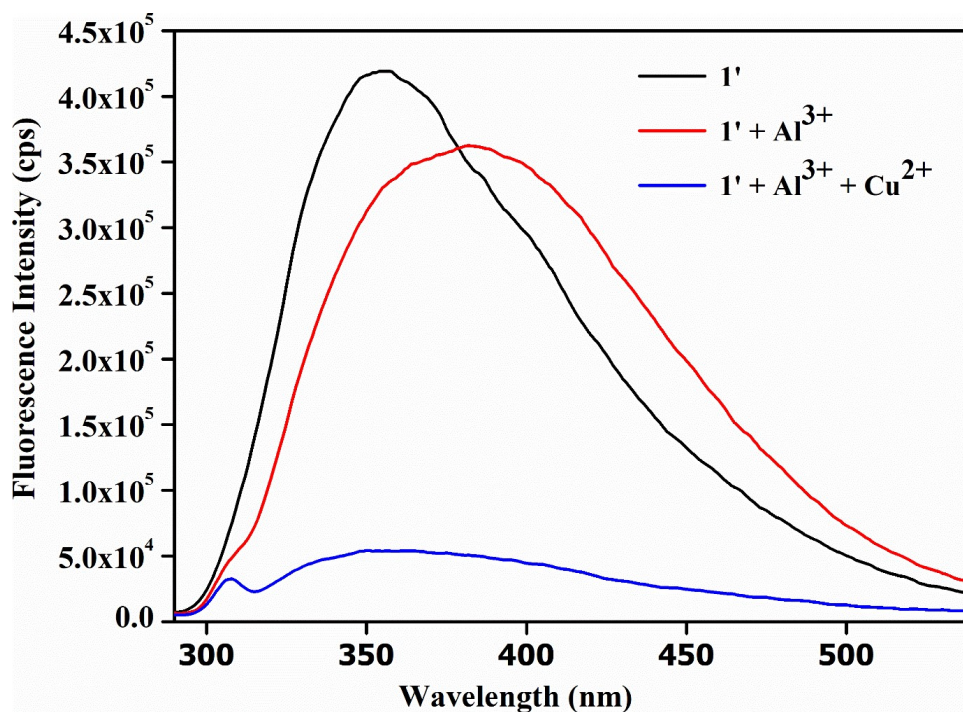

**Figure S19.** Fluorescence intensity of **1'** dispersed in acetonitrile after addition of 2 mM solution of  $\text{Cu}(\text{NO}_3)_2$  in acetonitrile (500  $\mu\text{L}$ ) in presence of 2 mM solution of  $\text{Al}(\text{NO}_3)_3$  in acetonitrile (500  $\mu\text{L}$ ).

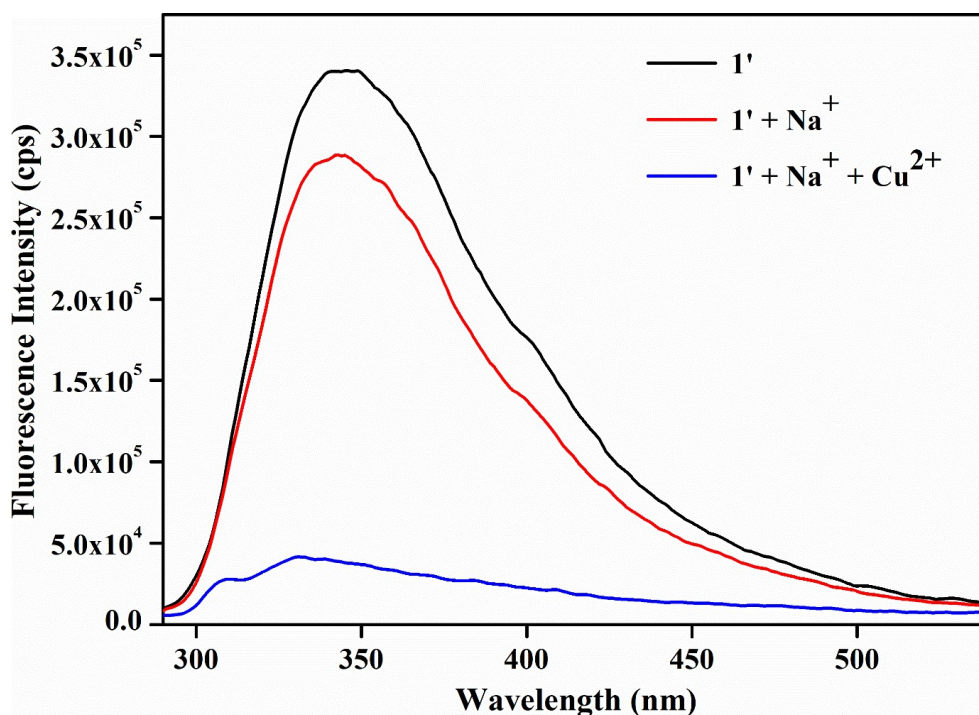

**Figure S20.** Fluorescence intensity of **1'** dispersed in acetonitrile after addition of 2 mM solution of  $\text{Cu}(\text{NO}_3)_2$  in acetonitrile (500  $\mu\text{L}$ ) in presence of 2 mM solution of  $\text{NaNO}_3$  in acetonitrile (500  $\mu\text{L}$ ).

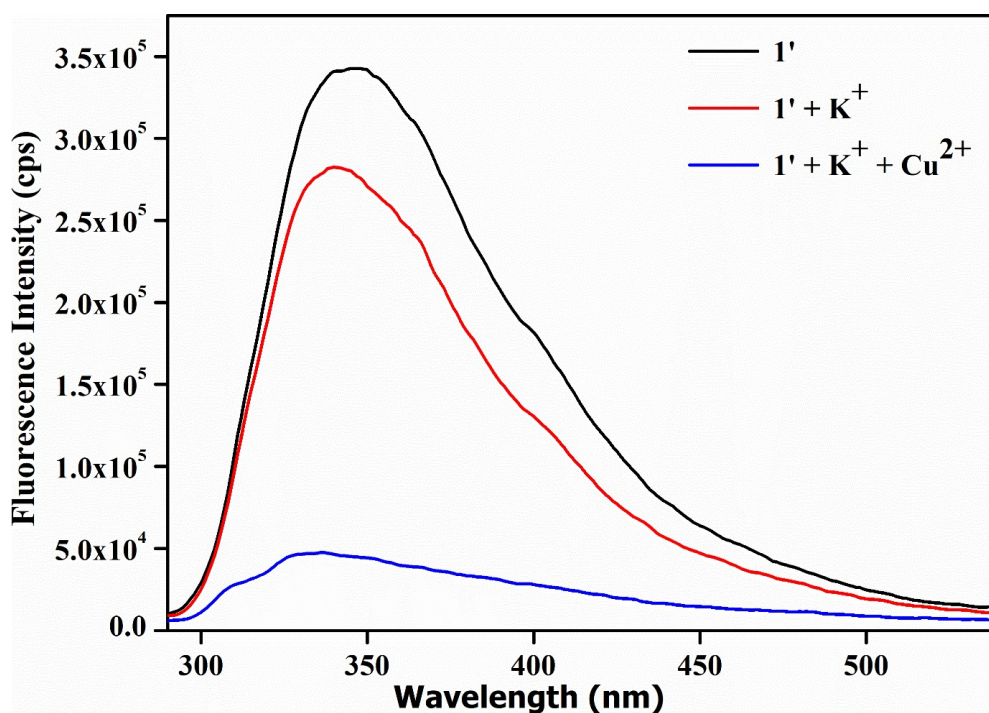

**Figure S21.** Fluorescence intensity of **1'** dispersed in acetonitrile after addition of 2 mM solution of  $\text{Cu}(\text{NO}_3)_2$  in acetonitrile (500  $\mu\text{L}$ ) in presence of 2 mM solution of  $\text{KNO}_3$  in acetonitrile (500  $\mu\text{L}$ ).

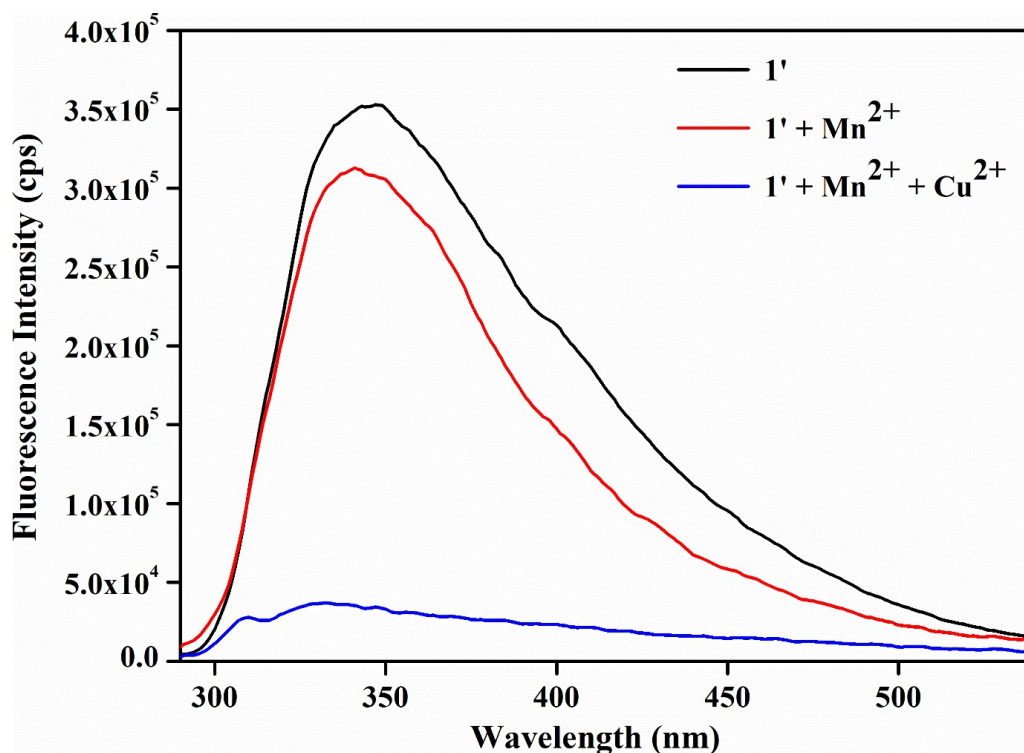

**Figure S22.** Fluorescence intensity of **1'** dispersed in acetonitrile after addition of 2 mM solution of  $\text{Cu}(\text{NO}_3)_2$  in acetonitrile (500  $\mu\text{L}$ ) in presence of 2 mM solution of  $\text{Mn}(\text{NO}_3)_3$  in acetonitrile (500  $\mu\text{L}$ ).

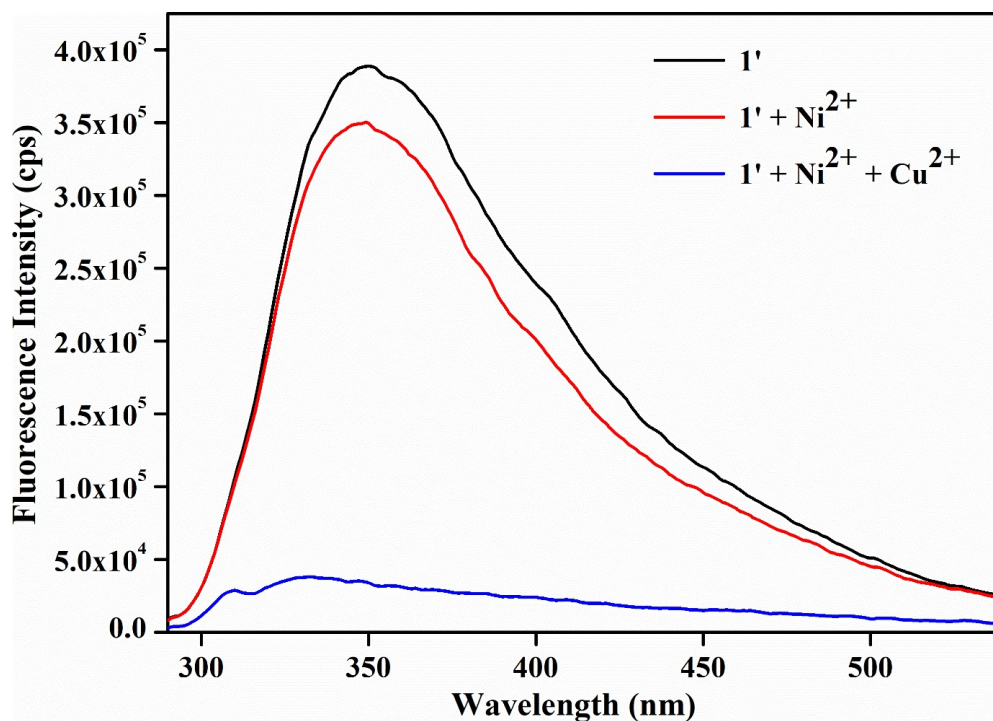

**Figure S23.** Fluorescence intensity of **1'** dispersed in acetonitrile after addition of 2 mM solution of  $\text{Cu}(\text{NO}_3)_2$  in acetonitrile (500  $\mu\text{L}$ ) in presence of 2 mM solution of  $\text{Ni}(\text{NO}_3)_2$  in acetonitrile (500  $\mu\text{L}$ ).

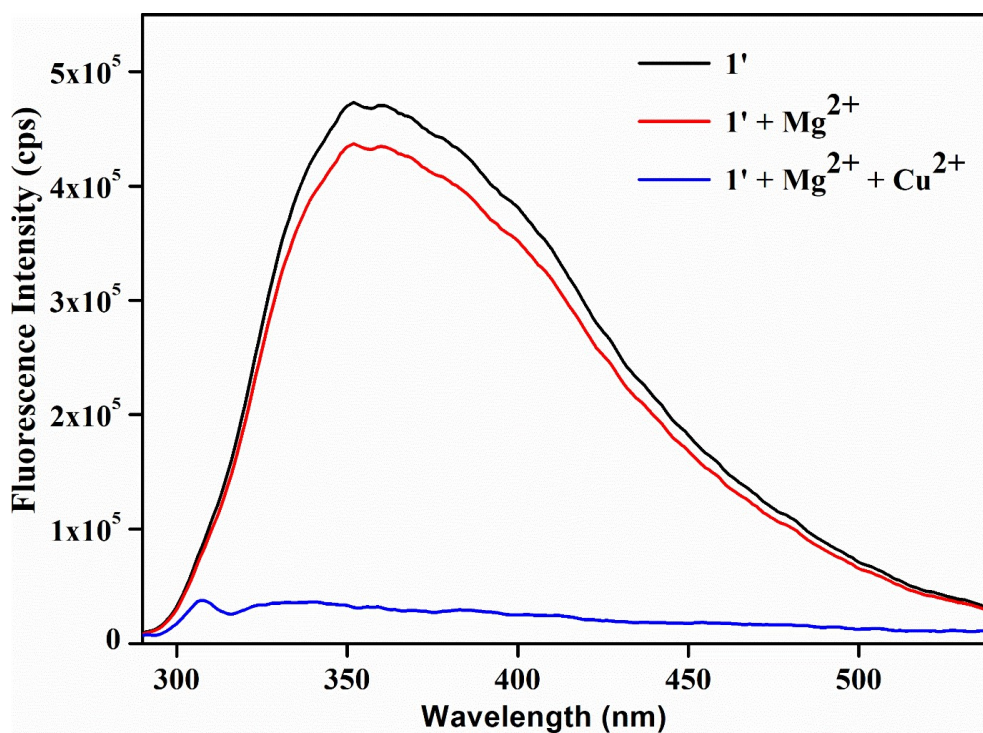

**Figure S24.** Fluorescence intensity of **1'** dispersed in acetonitrile after addition of 2 mM solution of  $\text{Cu}(\text{NO}_3)_2$  in acetonitrile (500  $\mu\text{L}$ ) in presence of 2 mM solution of  $\text{Mg}(\text{NO}_3)_2$  in acetonitrile (500  $\mu\text{L}$ ).

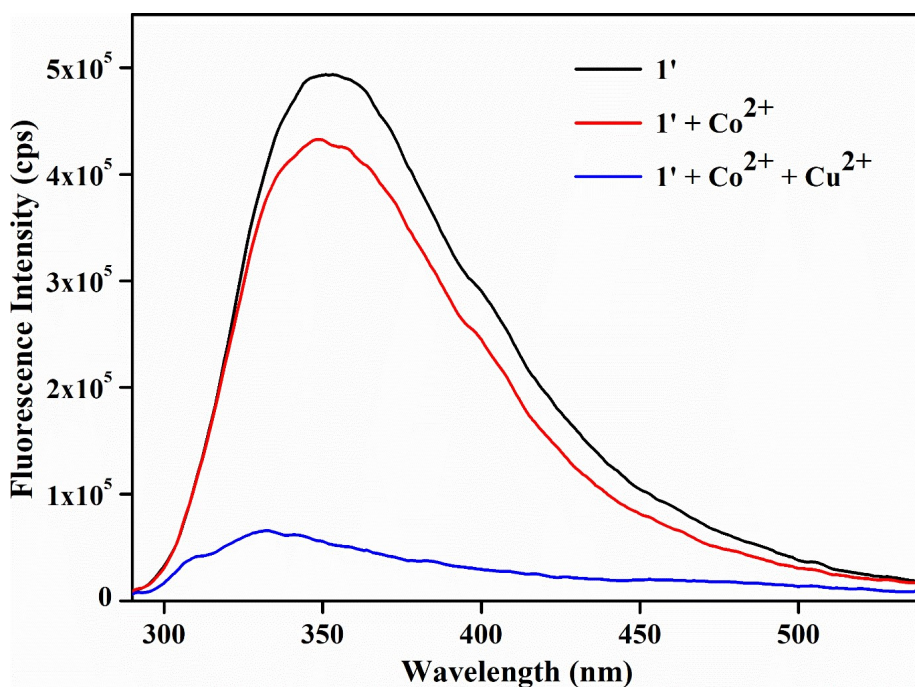

**Figure S25.** Fluorescence intensity of **1'** dispersed in acetonitrile after addition of 2 mM solution of  $\text{Cu}(\text{NO}_3)_2$  in acetonitrile (500  $\mu\text{L}$ ) in presence of 2 mM solution of  $\text{Co}(\text{NO}_3)_2$  in acetonitrile (500  $\mu\text{L}$ ).

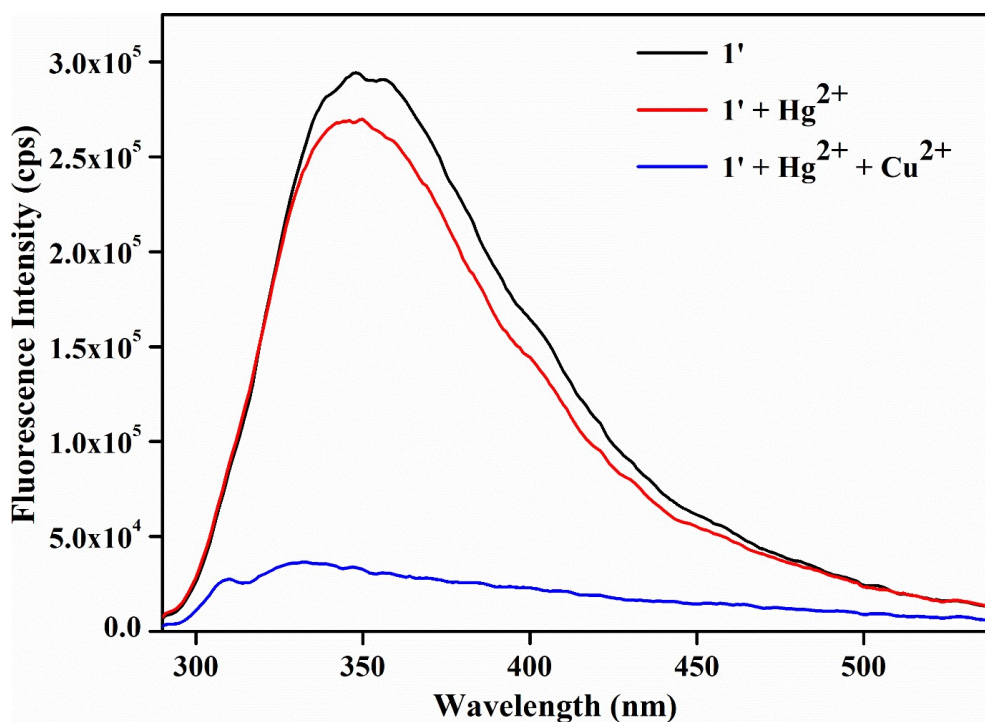

**Figure S26.** Fluorescence intensity of **1'** dispersed in acetonitrile after addition of 2 mM solution of  $\text{Cu}(\text{NO}_3)_2$  in acetonitrile (500  $\mu\text{L}$ ) in presence of 2 mM solution of  $\text{Hg}(\text{NO}_3)_2$  in acetonitrile (500  $\mu\text{L}$ ).

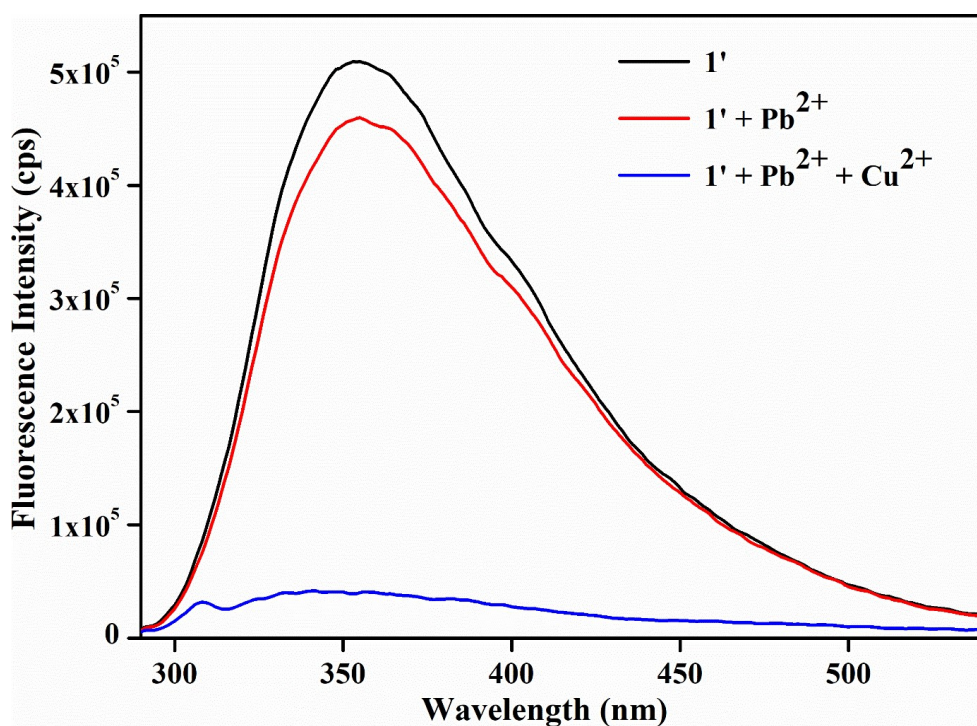

**Figure S27.** Fluorescence intensity of **1'** dispersed in acetonitrile after addition of 2 mM solution of  $\text{Cu}(\text{NO}_3)_2$  in acetonitrile (500  $\mu\text{L}$ ) in presence of 2 mM solution of  $\text{Pb}(\text{NO}_3)_2$  in acetonitrile (500  $\mu\text{L}$ ).

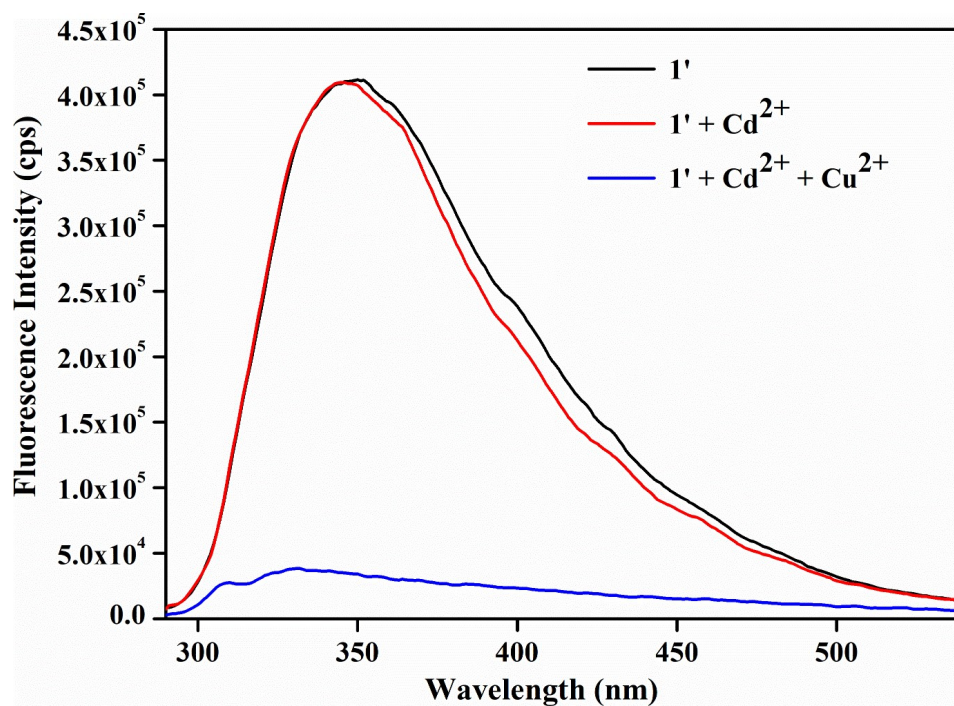

**Figure S28.** Fluorescence intensity of **1'** dispersed in acetonitrile after addition of 2 mM solution of  $\text{Cu}(\text{NO}_3)_2$  in acetonitrile (500  $\mu\text{L}$ ) in presence of 2 mM solution of  $\text{Cd}(\text{NO}_3)_2$  in acetonitrile (500  $\mu\text{L}$ ).

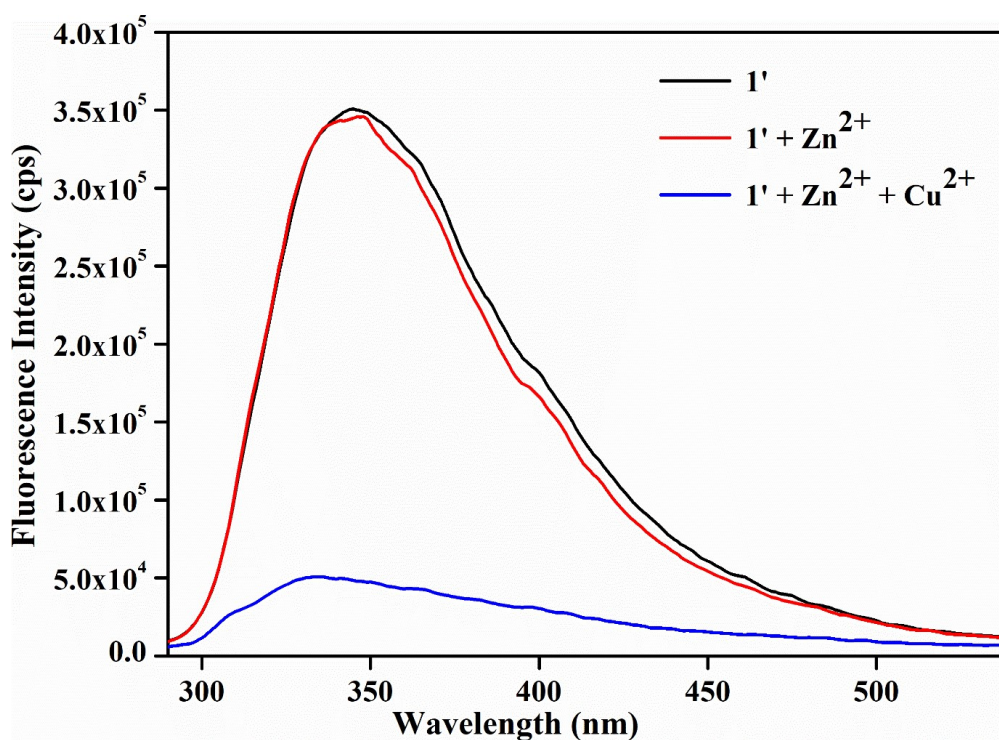

**Figure S29.** Fluorescence intensity of **1'** dispersed in acetonitrile after addition of 2 mM solution of  $\text{Cu}(\text{NO}_3)_2$  in acetonitrile (500  $\mu\text{L}$ ) in presence of 2 mM solution of  $\text{Zn}(\text{NO}_3)_2$  in acetonitrile (500  $\mu\text{L}$ ).



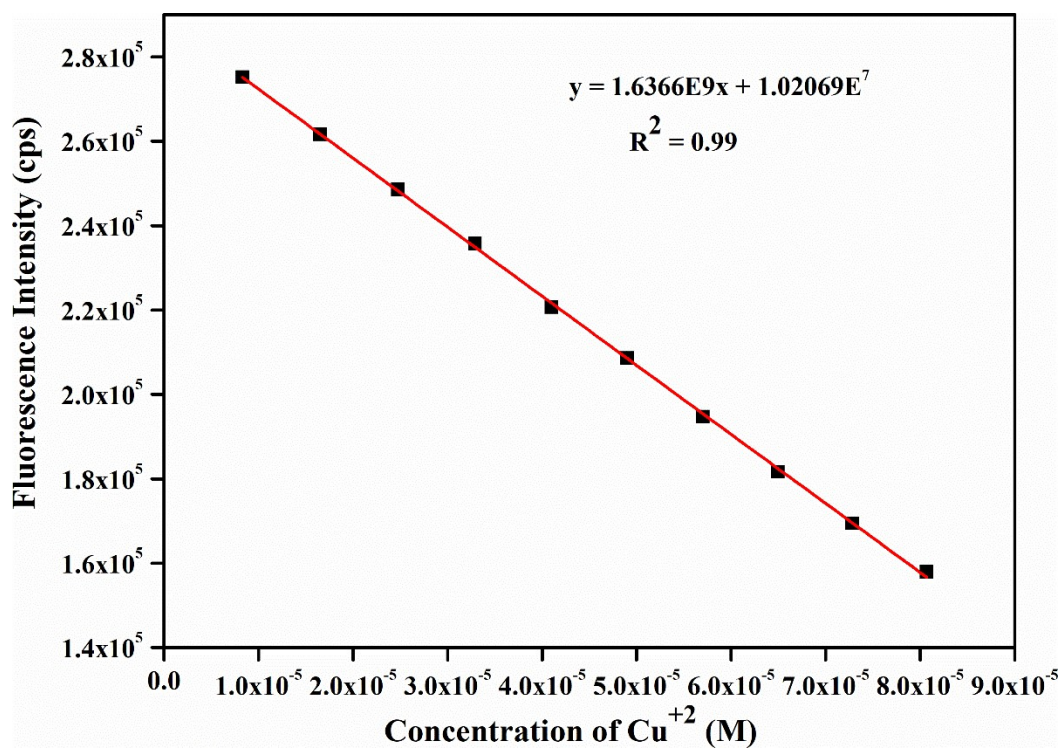

**Figure S30.** Change in the fluorescence intensity of **1'** as a function of Cu<sup>2+</sup> concentration.

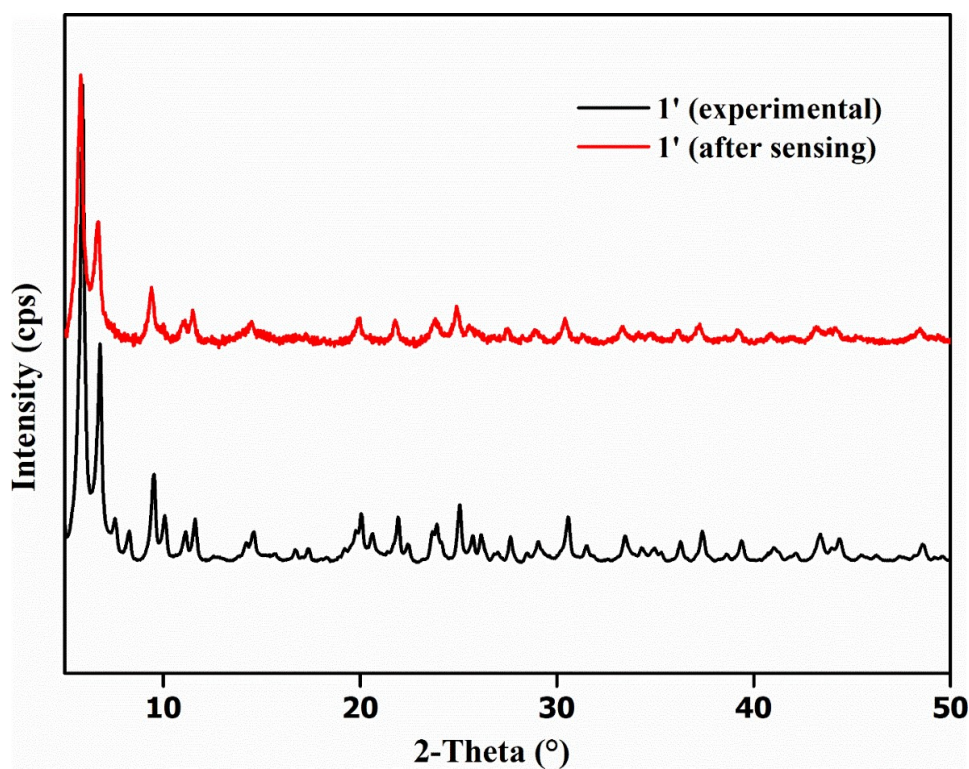

**Figure S31.** The PXRD pattern of **1'** (black line) and the PXRD pattern of **1'** after sensing (red line).

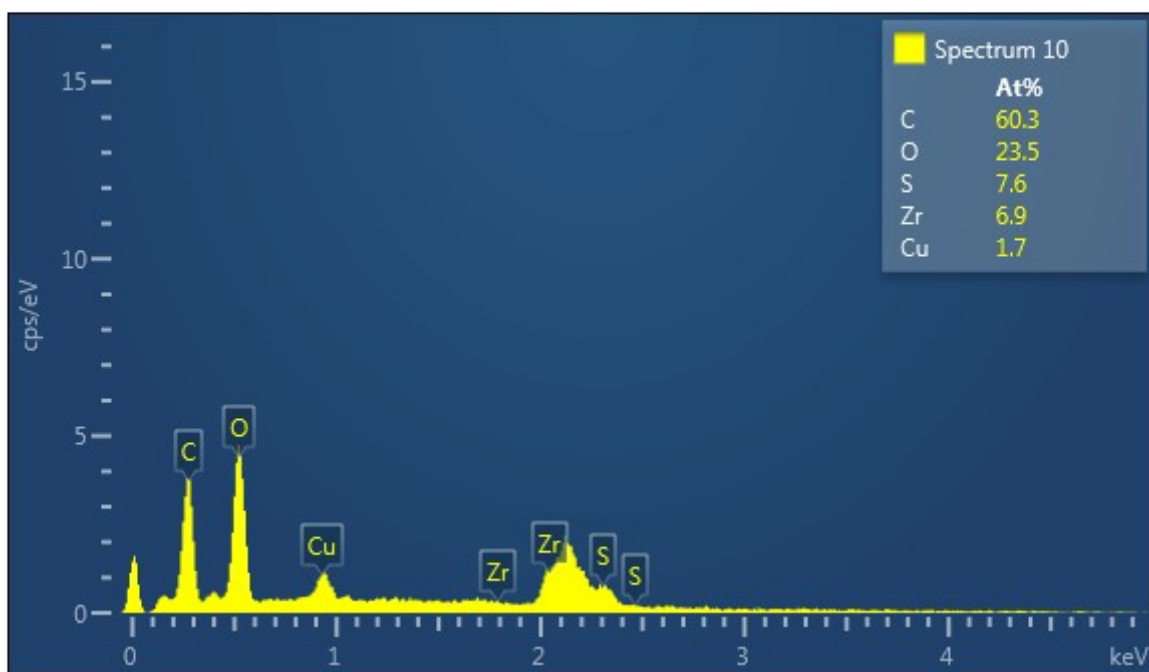

**Figure S32.** EDX spectrum of 1' after treatment with Cu<sup>2+</sup>.

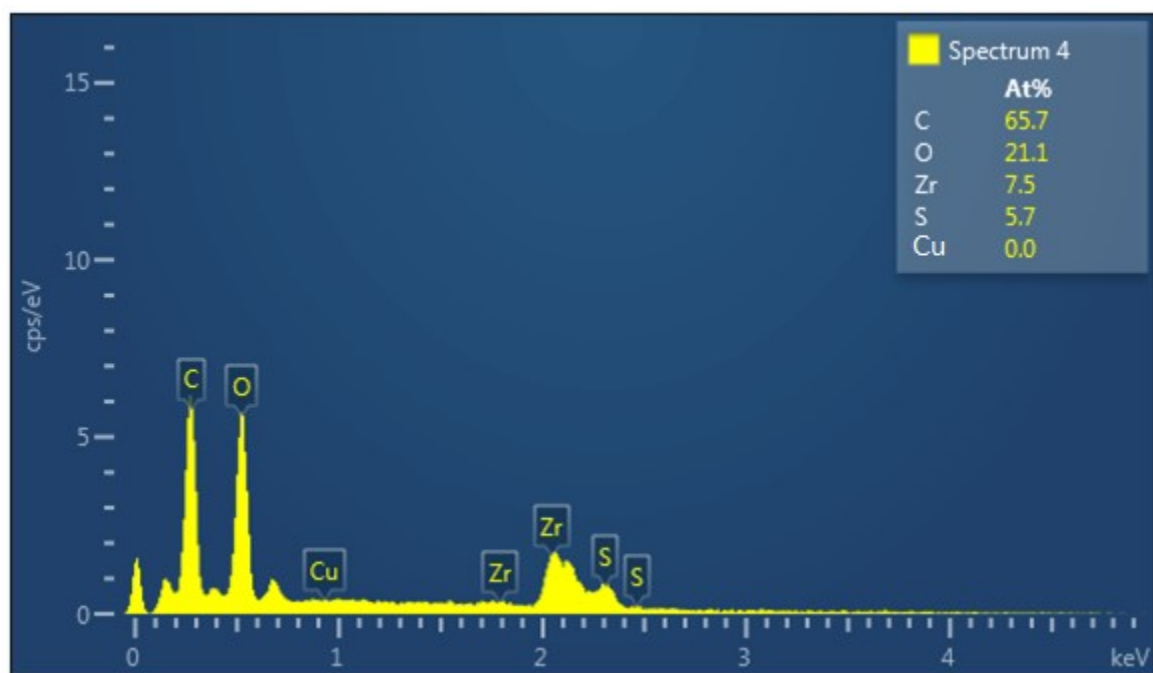

**Figure S33.** EDX spectrum of the recyclable sample of 1'.

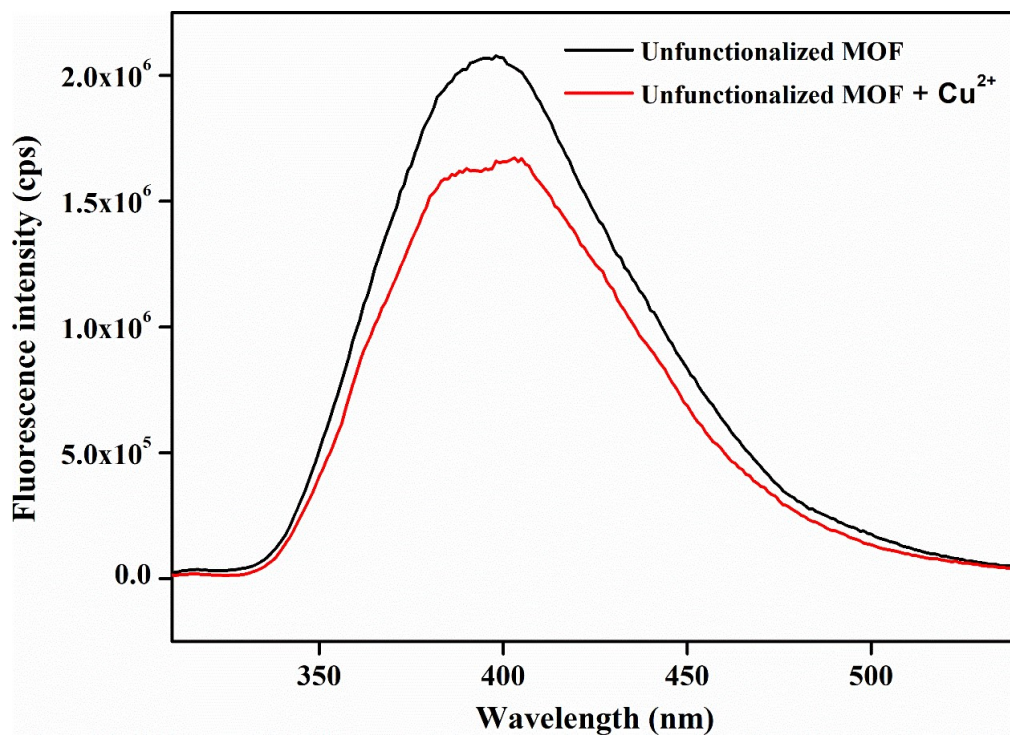

**Figure S34.** Fluorescence intensity of un-functionalized MOF with BPDC linker dispersed in acetonitrile and after addition of 2 mM solution of Cu(NO<sub>3</sub>)<sub>2</sub> in acetonitrile (500 μL).

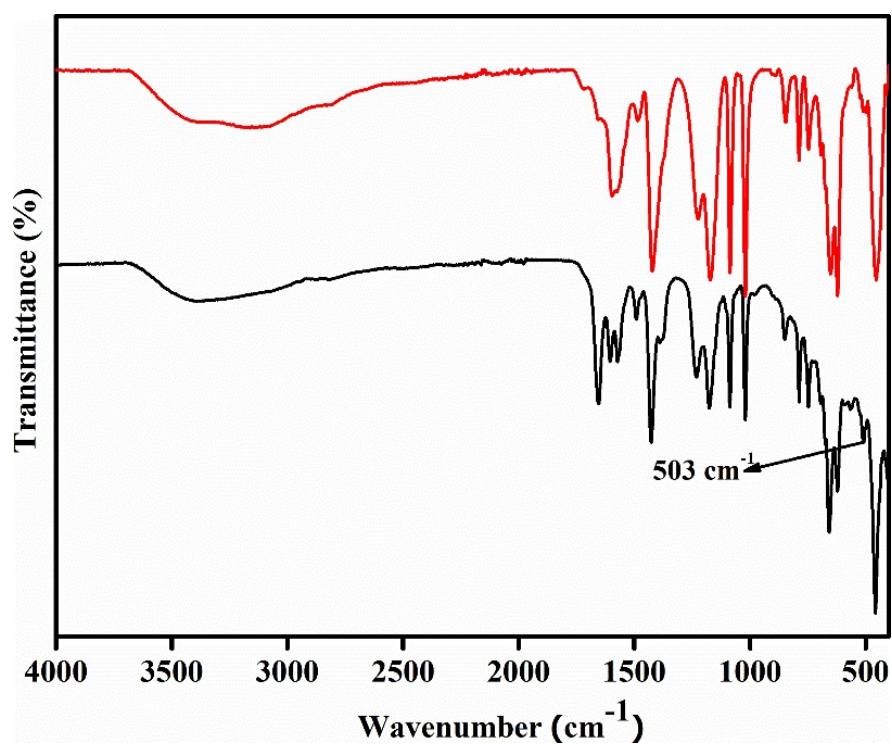

**Figure S35.** FT-IR spectra of MOF after treatment with Cu<sup>2+</sup>.

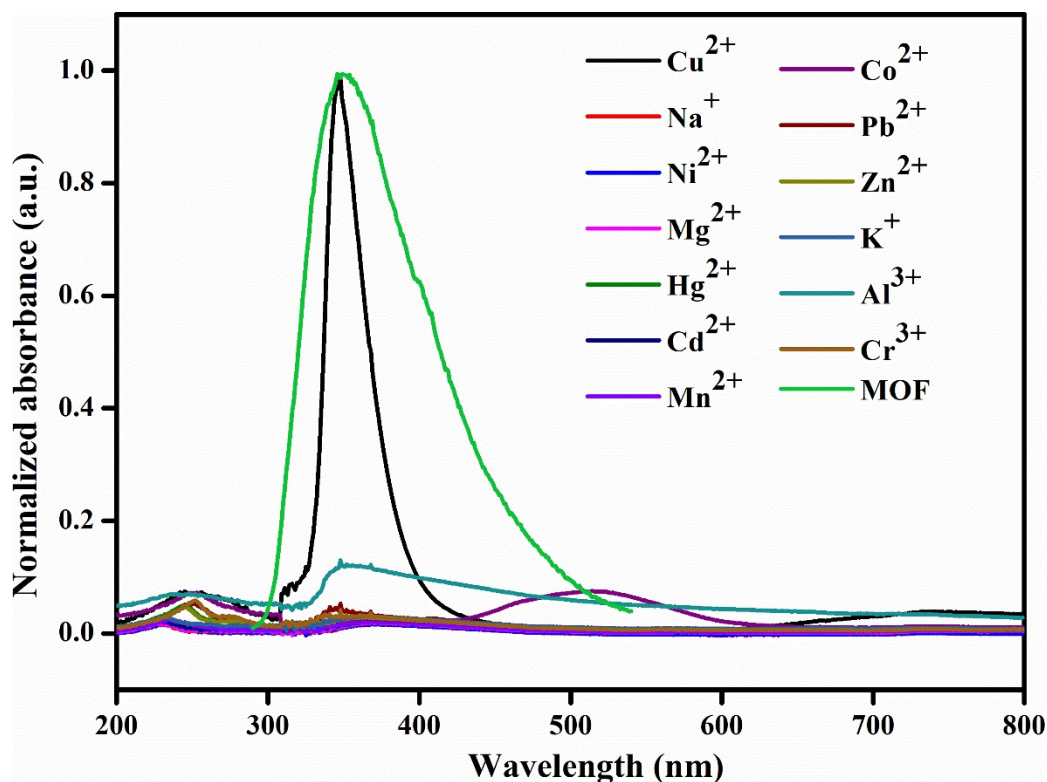

**Figure S36.** Fluorescence emission spectra of MOF and absorption all the analytes in acetonitrile.

**Table S1.** Fluorescence lifetimes of **1'** before and after the addition of  $\text{Cu}^{2+}$  solution ( $\lambda_{\text{ex}} = 270 \text{ nm}$ , pulsed diode laser).

| Volume of $\text{Cu}^{2+}$ solution added ( $\mu\text{L}$ ) | $B_1$ | $a_1$ | $\tau_1$ (ns) | $\langle\tau\rangle^*$ (ns) | $\chi^2$ |
|-------------------------------------------------------------|-------|-------|---------------|-----------------------------|----------|
| 0                                                           | 88.06 | 1     | 0.82          | 0.82                        | 1.097    |
| 75                                                          | 0.39  | 1     | 0.45          | 0.45                        | 1.008    |

#### LOD calculation:

The calculation of limit of detection (LOD) was performed in a systematic manner. The standard deviation ( $\sigma$ ) was calculated using the six-blank reading of MOF suspension in  $\text{CH}_3\text{CN}$ . The  $K$  value was obtained from the slope of the linear fit line of concentration versus fluorescence intensity plot (Figure S30). The above obtained parameters were used in the formula  $3\sigma/K$  in order to get the LOD value.

The standard deviation  $\sigma$  for the blank reading of MOF suspension was calculated using the following formula as given below.

$$\sigma = \sqrt{\frac{\sum (x_i - \mu)^2}{N}}$$

Where,  $\chi_i$  = Maxima of fluorescence intensities.

$\mu$  = The mean of all the maxima of fluorescence intensities.

$N$  = The number of blank readings.

**Table S2.** Comparison table of different MOF probes for the sensing of  $\text{Cu}^{2+}$ .

| S.I<br>N<br>O. | MOF                                                                                            | LOD                | Detection<br>time | Stern-<br>Volmer<br>constant<br>( $K_{sv}$ ) | Reference |
|----------------|------------------------------------------------------------------------------------------------|--------------------|-------------------|----------------------------------------------|-----------|
| 1              | PCN-222-Pd(II)                                                                                 | 50 nM              | 30 min            | N.A                                          | 2         |
| 2              | $[\text{Cd}_2(\text{PAM})_2(\text{dpe})_2(\text{H}_2\text{O})_2] \cdot 0.5(\text{dpe})$        | 1 mM               | N.A               | N.A                                          | 3         |
| 3              | $\text{Eu}^{3+}@\text{UiO}-66-2\text{COOH}$                                                    | 1 nM               | N.A               | $5.35 \times 10^4 \text{ M}^{-1}$            | 4         |
| 4              | MOF-525                                                                                        | 67 nM              | 40 s              | $4.5 \times 10^5 \text{ M}^{-1}$             | 5         |
| 5              | Cd-MOF-74                                                                                      | 78.7 $\mu\text{M}$ | N.A               | $1.81 \times 10^3 \text{ M}^{-1}$            | 6         |
| 6              | $[\text{Eu}(\text{pdc})_{1.5}(\text{DMF})] \cdot (\text{DMF})_{0.5}(\text{H}_2\text{O})_{0.5}$ | 0.1 $\mu\text{M}$  | N.A               | 89.4 $\text{M}^{-1}$                         | 7         |
| 7              | $[\text{NH}_4]_2[\text{ZnL}] \cdot 6\text{H}_2\text{O}$                                        | 1 $\mu\text{M}$    | N.A               | N.A                                          | 8         |
| 8              | $\text{Zn}(\text{MeIM})_2 \cdot (\text{DMF}) \cdot (\text{H}_2\text{O})_3$                     | 1 mM               | N.A               | N.A                                          | 9         |
| 9              | $\{\text{Mg}(\text{DHT})(\text{DMF})_2\}_n$                                                    | 10 $\mu\text{M}$   | N.A               | $170.2 \text{ M}^{-1}$                       | 10        |
| 10             | $\text{Eu}(\text{FBPT})(\text{H}_2\text{O})(\text{DMF})$                                       | 10 $\mu\text{M}$   | N.A               | N.A                                          | 11        |
| 11             | $[\text{Cd}(\text{H}_2\text{ttac})\text{bpp}]_n$                                               | 0.63 mM            | N.A               | N.A                                          | 12        |

|    |                                                                                                                                              |                    |      |                                    |           |
|----|----------------------------------------------------------------------------------------------------------------------------------------------|--------------------|------|------------------------------------|-----------|
| 12 | $[\text{Eu}_3(\text{HCOO})_2(\text{R-COO})_8]$                                                                                               | 10 $\mu\text{M}$   | N.A  | $2.35 \times 10^3 \text{ M}^{-1}$  | 13        |
| 13 | $\{[\text{Mg}_3(\text{ndc})_{2.5}(\text{HCO}_2)_2(\text{H}_2\text{O})][\text{NH}_2\text{Me}_2] \cdot 2\text{H}_2\text{O} \cdot \text{DMF}\}$ | 10 $\mu\text{M}$   | N.A  | $1.986 \times 10^3 \text{ M}^{-1}$ | 14        |
| 14 | $[\text{Cd}(2\text{-aip})(\text{bpy})] \cdot 2\text{DMF}$                                                                                    | 10 mM              | 10 s | N.A                                | 15        |
| 15 | $\{\text{NH}_2(\text{CH}_3)_2 \cdot \text{Cd}_{2.5}(\text{L})_2(\text{H}_2\text{O}) \cdot (\text{H}_2\text{O})\}_n$                          | 0.1 mM             | 9 s  | N.A                                | 16        |
| 16 | MIL-53-L                                                                                                                                     | 10 $\mu\text{M}$   | N.A  | $6.15 \times 10^3 \text{ M}^{-1}$  | 17        |
| 17 | $[\text{Eu}(\text{HL})(\text{L})(\text{H}_2\text{O})_2] \cdot 2\text{H}_2\text{O}$                                                           | 10 $\mu\text{M}$   | N.A  | N.A                                | 18        |
| 18 | Zr-BPDC-( $\text{SO}_3\text{H}$ ) <sub>2</sub>                                                                                               | 0.22 $\mu\text{M}$ | 15s  | $4.5 \times 10^5 \text{ M}^{-1}$   | this work |

## References:

1. L. Zhou, W. Deng, Y. Wang, G. Xu, S. Yin and Q. Liu, *Inorg. Chem.*, 2016, **55**, 6271–6277.
2. Y. Chen and H. Jiang, *Chem. Mater.*, 2016, **28**, 6698–6704.
3. J. Ye, L. Zhao, R. F. Bogale, Y. Gao, X. Wang, X. Qian, S. Guo, J. Zhao and G. Ning, *Chem. Eur. J.*, 2015, **21**, 2029-2037.
4. X. Zhao, D. Liu, H. Huang and C. Zhong, *Microporous Mesoporous Mater.*, 2016, **224**, 149-154.
5. L. Li, S. Shen, R. Lin, Y. Bai and H. Liu, *Chem. Commun.*, 2017, **53**, 9986-9989.
6. T. Zheng, J. Zhao, Z. Fang, M. Li, C. Sun, X. Li, X. Wang and Z. Su, *Dalton Trans.*, 2017, **46**, 2456-2461.
7. B. Chen, L. Wang, Y. Xiao, F. R. Fronczek, M. Xue, Y. Cui and G. Qian, *Angew. Chem. Int. Ed.*, 2009, **48**, 500-503.
8. S. Liu, J. Li and F. Luo, *Inorg. Chem. Commun.*, 2010, **13**, 870-872.
9. S. Liu, Z. Xiang, Z. Hu, X. Zheng and D. Cao, *J. Mater. Chem.*, 2011, **21**, 6649-6653.
10. K. Jayaramulu, R. P. Narayanan, S. J. George and T. K. Maji, *Inorg. Chem.*, 2012, **51**, 10089–10091.
11. Z. Hao, X. Song, M. Zhu, X. Meng, S. Zhao, S. Su, W. Yang, S. Song and H. Zhang, *J. Mater. Chem. A*, 2013, **1**, 11043-11050.
12. L. Pang, G. Yang, J. Jin, M. Kang, A. Fu, Y. Wang and Q. Shi, *Cryst. Growth Des.*, 2014, **14**, 2954–2961.
13. B. Liu, W. Wu, L. Hou and Y. Wang, *Chem. Commun.*, 2014, **50**, 8731-8734.
14. S. Bhattacharyya, A. Chakraborty, K. Jayaramulu, A. Hazra and T. K. Maji, *Chem. Commun.*, 2014, **50**, 13567-13570.
15. H. Wang, P. Liu, H. Chen, N. Xu, Z. Zhou and S. Zhuo, *RSC Adv.*, 2015, **5**, 65110-65113.

16. C. Qiao, X. Qu, Q. Yang, Q. Wei, G. Xie, S. Chen and D. Yang, *Green Chem.*, 2016, **18**, 951-956.
17. C. Liu and B. Yan, *Sensors and Actuators B*, 2016, **235**, 541–546.
18. Z. L, A. Liu, Y. Liu, J. Shen, C. Du and H. Hou, *Inorg. Chem. Commun.*, 2015, **56**, 137-140.
